# Supplementary material
Source: HighWire-hosted journal article supplement (https://www.cmajopen.ca/highwire/filestream/80960/field_highwire_adjunct_files/2/2016-0068-3-at.pdf)
Supplement: 2016-0068-3-at.pdf [file 2016-0068-3-at.pdf]

**Appendix 3 (as supplied by the authors):** Unadjusted and covariate-adjusted differences from lowest Street Smart Walk Score® quintile in minutes/day sedentary time, for respondents overall and by age group

| Age group | Quintile (SSWS range) | Weighted Mean (SD) mins/day sedentary time | Unadjusted difference [95% CI] | Adjusted <sup>a</sup> difference [95% CI] |
|-----------|-----------------------|--------------------------------------------|--------------------------------|-------------------------------------------|
| Everyone  | Q5 (80-100)           | 575.7 (91.5)                               | 2.9 [-9.3, 15.1]               | 1.66 [-9.87, 13.19] <sup>b</sup>          |
|           | Q4 (59-79)            | 574.2 (86.7)                               | 1.5 [-9.6, 12.6]               | -6.12 [-17.29, 5.04] <sup>b</sup>         |
|           | Q3 (41-58)            | 578.7 (93.4)                               | 6.0 [-5.8, 17.7]               | -3.44 [-14.80, 7.92] <sup>b</sup>         |
|           | Q2 (23-40)            | 573.4 (84.2)                               | 0.7 [-10.1, 11.5]              | -4.50 [-14.70, 5.71] <sup>b</sup>         |
|           | Q1 (0-22)             | 572.7 (79.5)                               | REF                            | REF <sup>b</sup>                          |
| 6 to 11   | Q5 (80-100)           | 468.8 (43.5)                               | 8.0 [-9.4, 25.5]               | -3.74 [-21.23, 13.75]                     |
|           | Q4 (59-79)            | 471.3 (40.3)                               | 10.5 [-6.0, 27.0]              | -2.16 [-19.27, 14.94]                     |
|           | Q3 (41-58)            | 461.3 (50.0)                               | 0.5 [-18.2, 19.2]              | -5.79 [-23.14, 11.56]                     |
|           | Q2 (23-40)            | 468.4 (48.1)                               | 7.6 [-9.7, 24.9]               | 0.61 [-15.94, 17.16]                      |
|           | Q1 (0-22)             | 460.8 (46.6)                               | REF                            | REF                                       |
| 12 to 17  | Q5 (80-100)           | 562.1 (47.1)                               | 4.8 [-19.2, 28.9]              | -1.42 [-16.78, 13.93]                     |
|           | Q4 (59-79)            | 550.5 (63.3)                               | -6.8 [-35.8, 22.3]             | -1.25 [-17.22, 14.72]                     |
|           | Q3 (41-58)            | 556.8 (65.7)                               | -0.4 [-22.5, 21.6]             | -3.88 [-17.36, 9.60]                      |
|           | Q2 (23-40)            | 558.4 (68.4)                               | 1.1 [-19.9, 22.2]              | -9.67 [-24.27, 4.92]                      |
|           | Q1 (0-22)             | 557.3 (48.5)                               | REF                            | REF                                       |
| 18 to 29  | Q5 (80-100)           | 587.9 (116.4)                              | 22.7 [-12.2, 57.6]             | 29.59 [-1.23, 60.42]                      |
|           | Q4 (59-79)            | 559.9 (98.3)                               | -5.3 [-36.6, 26.0]             | 4.44 [-27.01, 35.89]                      |
|           | Q3 (41-58)            | 583.4 (94.5)                               | 18.3 [-11.7, 48.3]             | 12.08 [-15.87, 40.02]                     |
|           | Q2 (23-40)            | 580.1 (113.7)                              | 14.9 [-20.3, 50.0]             | 18.48 [-12.49, 49.45]                     |
|           | Q1 (0-22)             | 565.2 (112.3)                              | REF                            | REF                                       |
| 30 to 44  | Q5 (80-100)           | 581.5 (98.0)                               | -4.4 [-27.9, 19.0]             | -1.68 [-22.41, 19.04]                     |

|          |             |               |                     |                       |
|----------|-------------|---------------|---------------------|-----------------------|
|          | Q4 (59-79)  | 578.9 (77.1)  | -7.0 [-28.1, 14.1]  | -13.64 [-33.94, 6.65] |
|          | Q3 (41-58)  | 582.5 (107.6) | -3.5 [-34.4, 27.5]  | -5.89 [-31.93, 20.15] |
|          | Q2 (23-40)  | 571.3 (73.6)  | -14.6 [-35.4, 6.2]  | -16.81 [-34.64, 1.02] |
|          | Q1 (0-22)   | 585.9 (79.7)  | REF                 | REF                   |
| 45 to 64 | Q5 (80-100) | 580.4 (100.1) | -13.5 [-35.9, 8.9]  | -2.98 [-21.51, 15.55] |
|          | Q4 (59-79)  | 593.2 (107.6) | -0.7 [-22.1, 20.8]  | -4.11 [-22.70, 14.49] |
|          | Q3 (41-58)  | 595.1 (98.5)  | 1.2 [-17.1, 19.4]   | -10.33 [-26.00, 5.33] |
|          | Q2 (23-40)  | 595.2 (92.8)  | 1.3 [-15.4, 18.1]   | -6.22 [-19.37, 6.92]  |
|          | Q1 (0-22)   | 593.9 (76.4)  | REF                 | REF                   |
| 65 to 79 | Q5 (80-100) | 579.8 (78.7)  | -32.6 [-62.2, -2.9] | -12.80 [-33.98, 8.38] |
|          | Q4 (59-79)  | 606.8 (68.6)  | -5.6 [-23.8, 12.5]  | -0.88 [-17.62, 15.86] |
|          | Q3 (41-58)  | 619.4 (76.3)  | 7.0 [-12.7, 26.6]   | 11.41 [-6.37, 29.20]  |
|          | Q2 (23-40)  | 610.8 (63.6)  | -1.6 [-20.9, 17.7]  | 2.48 [-15.7, 20.66]   |
|          | Q1 (0-22)   | 612.4 (57.3)  | REF                 | REF                   |

CI = confidence interval, Q1 = 1<sup>st</sup> Street Smart Walk Score® quintile, Q2 = 2<sup>nd</sup> Street Smart Walk Score® quintile, Q3 = 3<sup>rd</sup> Street Smart Walk Score® quintile, Q4 = 4<sup>th</sup> Street Smart Walk Score® quintile, Q5 = 5<sup>th</sup> Street Smart Walk Score® quintile. <sup>a</sup>All estimates adjusted for sex, visible minority status, immigration to Canada in the past 10 years, having a post-secondary graduate in the household, household income quintile, number of children under 12 in the household, whether respondents work or attend school, whether respondents have difficulty walking, and activity monitor wear time. <sup>b</sup>Analyses of all respondents also adjusted for age category. Street Smart Walk Score® values from 2014. Remaining variables from 2007-2011 Canadian Health Measures Survey.
